1

2

RUNNING HEADER: HOST GENETIC COMPONENT OF THE MICROBIOME

3

4

**SHORT REPORT: Signs of host genetic regulation in the microbiome composition in  
cattle**

5

6

7

**O. Gonzalez-Recio<sup>\*</sup>, I. Zubiria<sup>†</sup>, A. García-Rodríguez<sup>‡</sup>, A. Hurtado<sup>††</sup>, R. Atxaerandio<sup>†</sup>**

8

9

<sup>\*</sup> Departamento de Mejora Genética Animal. Instituto Nacional de Investigación y  
Tecnología Agraria y Alimentaria. 28040 Madrid, Spain

10

11

<sup>†</sup> Departamento de Producción Animal. NEIKER-Tecnalia. Granja Modelo de Arkaute  
Apartado 46, 01080 Vitoria-Gasteiz, Spain

12

13

<sup>††</sup> Departamento de Sanidad Animal. NEIKER-Tecnalia. Berreaga 1, 48160 Derio, Spain

14

15

**Corresponding author:** Oscar González-Recio. E-mail: gonzalez.oscar@inia.es

16

17

18

## ABSTRACT

19 Previous studies have revealed certain genetic control by the host over the microbiome  
 20 composition, although in many species the host genetic link controlling microbial  
 21 composition is yet unknown. This potential association is important in livestock to study all  
 22 factors and interactions that rule the effect of the microbiome in complex traits. This report  
 23 aims to study whether the host genotype exerts any genetic control on the microbiome  
 24 composition of the rumen in cattle. Data on 16S and 18S rRNA gene-based analysis of the  
 25 rumen microbiome in 18 dairy cows from two different breeds (Holstein and Brown Swiss)  
 26 were used. The effect of the genetic background of the animal (through the breed and Single  
 27 Nucleotide Polymorphisms; SNP) on the relative abundance (RA) of archaea, bacteria and  
 28 ciliates (with average relative abundance per breed >0.1%) was analysed using Bayesian  
 29 statistics. In total, 13 genera were analysed for bacteria (5), archaea (1), and ciliates (7). All  
 30 these bacteria and archaea genera showed association to the host genetic background both for  
 31 breed and SNP markers, except RA for the genera *Butyrivibrio* and *Ruminococcus* that  
 32 showed association with the SNP markers but not with the breed composition. Relative  
 33 abundance of 57% (4/7) of ciliate analysed showed to be associated to the genetic  
 34 background of the host. This host genetic link was observed in some genus of *Trichostomatia*  
 35 family. For instance, the breed had a significant effect on *Isotricha*, *Ophryoscolex* and  
 36 *Polyplastron*, and the SNP markers on *Entodinium*, *Ophryoscolex* and *Polyplastron*. In total,  
 37 77% (10/13) of microbes analysed showed to be associated to the host genetic background  
 38 (either by breed or SNP genotypes). Further, the results showed a significant association  
 39 between DGAT1, ACSF3, AGPAT3 and STC2 genes with the relative abundance *Prevotella*  
 40 genus with a false discovery rate lower than 15%. The results in this study support the

41 hypothesis and provide some evidence that there exist a host genetic component in cattle that  
42 can partially regulate the composition of the microbiome.

43

44

45 **Keywords:** genomic, breed, SNP, Holstein, Brown Swiss, microbiome, NGS

46 **Abbreviations:** FDR: False Discovery Rate; NGS: Next Generation Sequencing; MAF:

47 Minor Allele Frequency; OTU: operational taxonomic units; PC: Principal components; RA:

48 Relative abundance; SNP: Single Nucleotide Polymorphisms.

49

50

51

52 The research interest on the microbiome and its effects on the host, both in humans [1,2] and  
 53 livestock [3,4], is raising in the last years. The microbiome plays an important role in the  
 54 phenotypic expression of many phenotypes such as feed efficiency, disease status, or methane  
 55 emission. Traditionally, microbes have been studied in the lab, without considering their  
 56 effect on complex features and their interaction with the host. In the particular case of  
 57 livestock, the traits of interest are usually related to productive, health or environmental  
 58 factors. In the last decade, more attention has been focused on the interactions between  
 59 microbes and diet [5–8], methane emissions [9–13] and the microbiome compositions across  
 60 hosts, environment and age [4,7,14]. It has also been proposed as a predictor of complex  
 61 traits [13,15].

62 Therefore, there is an increasing interest on determining whether a host genetic control on the  
 63 microbiome composition exists. Recent studies show some evidences that support the  
 64 hypothesis that there is some sort of host control over the composition of the microbiome in  
 65 mammals. For instance, Weimer et al. (2010) reported that after a near-total exchange of  
 66 ruminal contents, the ruminal bacterial composition returned to a similar status to that prior  
 67 the exchange. More recently, [17] showed differences between sire progeny groups on the  
 68 archaea:bacteria ratio in Aberdeen Angus and Limousin cattle breeds, and [18] reported  
 69 heritabilities above 0.20 for the relative abundance of several microbes in a twin human  
 70 study.

71 It is of interest to provide more evidences on the host genetic control of the microbiome  
 72 composition because some selection intensity could be applied to select individuals with a  
 73 favourable microbiome for a given breeding goal, as the reduction of methane yield or the  
 74 improvement of the feed efficiency, for example.

75 This trial was carried out in accordance with Spanish Royal Decree 53/2013 for the  
 76 protection of animals used for experimental and other scientific purposes. In this study,

77 ruminal content was sampled from 18 dairy cows (10 Holstein and 8 Brown Swiss) from  
 78 Fraisoro Farm School (Zizurkil, Gipuzkoa, Spain). These cows were undergoing a nutrition  
 79 experiment. They were randomly assigned to one of two experimental concentrate  
 80 supplements. Concentrates were formulated to contain cold-pressed rapeseed cake or palm as  
 81 fat sources, and to provide equal amounts of crude protein, energy and fat. Both breeds were  
 82 fed both diets. The effect of the treatment was adjusted as a 2-levels factor in the statistical  
 83 analyses, but results are not reported here as this is not the objective of this study.

84 Rumen samples were taken 4 times over two consecutive days. Sampling began at 00:00 and  
 85 12:00 h on d 1, and 06:00 and 18:00 h on d 2; each sampling taking approximately 2 h.  
 86 Ruminal samples were collected from each dairy cow using a stomach tube connected to a  
 87 mechanical pumping unit. About 100 ml of each ruminal extraction were placed into a  
 88 container and were frozen immediately after the extraction and then stored at  $-20\pm5^{\circ}\text{C}$  until  
 89 analysis.

90 Then, samples were gradually thawed overnight at refrigeration ( $5\pm3^{\circ}\text{C}$ ) and squeezed  
 91 through four layers of sterile cheesecloth to separate solid (solids with a particle size smaller  
 92 than the diameter of the tube) from liquid digesta phases. This latter phase was subsequently  
 93 separated into planktonic organisms and bacteria associated with the liquid fraction. The solid  
 94 phase was separated in associated and adherent fractions. Fractionation procedures were  
 95 carried out following the methodology described in [19]. The four fractions were lyophilized  
 96 and composited to obtain a unique sample with the four fractions represented proportionally  
 97 (on dry matter basis).

98 After composition, DNA extraction was performed using the commercial Power Soil DNA  
 99 Isolation kit (Mo Bio Laboratories Inc, Carlsbad, CA, USA) following manufacturer's  
 100 instructions. The extracted DNA was subjected to paired-end Illumina sequencing of the V4  
 101 hypervariable region of the 16S rRNA [20] and of the V7 region of the 18S rRNA genes. The

libraries were generated by means of Nextera kit. The 250 bp paired-end sequencing reactions were performed on a MiSeq platform (Illumina, San Diego, CA, USA).

Sequence data were processed using the QIIME software package version 1.9.1 [21]. Sequences below 220 bp in length and Phred score below 20 were discarded. In total, 3,261,168 and 3,431,242 reads from the 16S and 18S rRNA regions respectively, were analysed. Sequence data were grouped into operational taxonomic units (OTU) sharing 97% sequence similarity, and assigned to phylogenetic groups by BLAST [22].

Bacterial and archaeal 16S rRNA genes were assigned using the GreenGenes database (May 2013 version) and ciliate protozoal 18S rRNA genes against SILVA database (March 2015 version). Data were summarised at the genus level. Relative abundance (RA) of genera in each animal was calculated after excluding those genera that appeared in <0.1% proportion in the previous step. Only genera showing average RA>0.1% in both breeds were kept for subsequent analyses.

Genotypes from animals under study were also obtained with the Illumina 9K chip (Illumina, Inc, San Diego, CA, USA). A total of 9,146 SNPs with minor allele frequency (MAF) >0.05 in the whole genotyped Spanish population were kept (data provided by the Spanish Holstein association [www.conafe.com](http://www.conafe.com) from more than 3,000 individuals).

We used two strategies to analyse the host genetic effect on the microbiome composition. Our response variable was the RA of the most common ruminal microbes previously found, and the model adjusted by diet treatment (2 groups, with or without cold-pressed rapeseed cake) and age (primiparous vs multiparous) groups and days in milk as a covariate. In the first strategy, differences at the breed level (Holstein vs Brown Swiss) were estimated (Model 1).

Model 1)

$$RA_{ijklm} = \mu + diet_j + age\_group_k + lactation\_group_l + breed_m + e_{ijklm}$$

The second strategy included the first two principal components (PC) of a genomic relationship matrix instead of the breed effect as

Model 2)

$$RA_{ijklmn} = \mu + diet_j + age\_group_k + lactation\_group_l + PC\_1_m + PC\_2_n + e_{ijklmn}$$

This genomic relationship matrix was calculated as in [23], where the genome relationship between individuals  $i$  and  $j$  can be calculated as

$$G_{ij} = \frac{1}{L} \sum_{k=1}^L \frac{(g_{ik} - \hat{p}_k)(g_{jk} - \hat{p}_k)}{\hat{p}_k(1 - \hat{p}_k)}$$

where  $g_{ik}$  refers to the gene frequency value genotypes  $AA$ ,  $Aa$  and  $aa$ , coded as 1, 0.5 and 0, respectively, of individual  $i$  or  $j$  at locus  $k$  ( $k = 1, 9146$ ). Gene frequency is half the number of copies of the reference allele  $A$ . Then,  $\hat{p}_k$  was the estimated allele frequency in the whole genotyped population as provided by CONAFE. The first PC of this matrix aims to detect stratification at the breed level (Holstein vs Brown Swiss), whereas the subsequent PC are expected to capture genomic differences between individuals.

Bayesian analyses were performed to estimate the breed and principal component effects [24] using an in-home suite of programs written in R software [25]. Evidence of a host genetic effect was considered when the 80% of the posterior distribution for the breed or the PC had the same sign (either positive or negative). This is, 80% of the posterior probability for the respective effect fell either above or below zero. Those microorganisms that showed evidence of a host genetic control were selected to implement genome wide association analyses. Here, the RA of those microorganisms was used as a dependent variable, and the SNP markers were selected as explicative variables in a single marker linear regression model, including

breed and diet as environmental factors. The p-values were adjusted on false discovery rate (FDR).

The gene content of the significant SNP was examined using the bovine genome annotation in BioMart tool of Emsembl ([ensembl.org/biomart](http://ensembl.org/biomart)) using Ensembl Genes 75 database. The National Center for Biotechnology Information (NCBI) database and PubMed were employed to investigate the potential biological relation of the genes that contained the SNP and the microbes in order to propose candidate genes that underlie the detected associations.

## RESULTS AND DISCUSSION

The results from the 16S rRNA region showed a 98:2 for the bacteria:archaea ratio. The more abundant bacterial phyla were *Bacteroidetes* (58%), *Firmicutes* (33%) and TM7 (*Candidatus Saccharibacteria*) (4%). Methanobacteria was the most abundant clade among the archaeas. Taxa composition was similar to those reported before in other ruminal microbiome communities [7,13], being mainly microbes related to peptide and cellulose degradation or to the synthesis of microbial protein and volatile fatty acids.

### *Bacteria and archaea*

The RA of genera analysed are shown in Figure 1. *Prevotella* was the most abundant bacteria-archaea genus in both breeds, followed by *Butyrivibrio* and *Succiniclasicum*. The archaea *Methanobrevibacter* was more abundant than the rest of the archaea genera detected in the samples.

Table 1 shows the results from the statistical analyses of the host genetic component on the different RA. The analyses showed differences between breeds for 4 (*Methanobrevibacter*, *Succiniclasicum*, *Prevotella* and *YRC22*) out of the 6 archaea and bacteria genera analysed



from 16S rRNA region. However, either the first or second genomic PC were significant for all other genus analysed (Table 1).

# *Ciliate*

Figure 2 shows the relative abundance of the analysed ciliate in both breeds. The genus *Entodinium* was the most abundant among the ciliate protozoal, followed by *Isotricha*. Phenotypically, *Ophryoscolex*, *Diplodinium* and *Polyplastron* were more abundant in Holstein, whereas *Dasytricha* showed larger RA in Brown Swiss. The breed effects showed differences in 3 (*Isotricha*, *Ophryoscolex* and *Polyplastron*) out of 7 ciliate genus analysed. The genomic PCs were also statistically significant for these genera, except for *Isotricha*, where the posterior distribution did not show a significant effect for the PCs (Table 2).

Despite the small sample size, RA for 77% (10/13) of the genera analysed were found to be regulated by some host genetic factor (breed, SNP marker, or both), which suggest that the microbiome composition is regulated by some genetic mechanisms in the host. The host genetic background showed to have effect on a larger proportion of bacteria-archaea, in comparison to ciliates. We did not find a host genetic effect on the relative abundance of genera *Trichostomatia*, *Dasytricha*, and *Diplodinium*. These microbes might be more influenced by diet than by the host genetic effect, and larger sample sizes might be necessary to detect differences between breeds or host genetic effects.

[18] also showed host genetic effect on the RA of different genera and families of *Firmicutes* and *Euryarchaeota* (e.g. *Turicibacter*, *Blautia* *Clostridiaceae*, *Ruminococcaceae* or *Methanobrevibacter*) in humans. Their study also showed a host genetic effect on some *Tenericutes*, *Proteobacteria* (Family *Oxalobacteraceae*) and *Actinobacteria* (Genera *Bifidobacterium* and *Actinomyces*). Our study also shows a host genetic effect on some

genera of Firmicutes but also on some *Bacteroidetes* differently to [18] and ciliate which were not analysed in the human study as they are not abundant in the human gut. Rohe et al. [17] showed differences in the microbial community of progeny daughters from different cattle breeds and sires, suggesting that even under the same diet and environmental circumstances, individuals can differ in their microbial communities depending on their progenitors.

Microbial networks for 16S and 18S-gene rRNA regions were constructed using the algorithm described by [26] and their graphical representations are shown in Figures S1 and S2. The microorganisms that showed to be related to the host genetics are relevant in the composition of the ruminal environment and the degradation of feed. For instance, bacteria from the *Prevotella*, the most abundant group, and *Paraprevotella* genera are involved in the metabolism of proteins and peptides in the rumen. They break down protein and carbohydrates in feed [27], synthesize *de novo* peptides and use products of cellulose degradation from other cellulolytic bacteria [28,29]. Further, bacteria from the genus *Ruminococcus* break down cellulose, hemicellulose and produce succinic acid as a major fermentation product together with acetic and formic acids, hydrogen and CO<sub>2</sub>. These products are then used by other bacteria, some from the *Succinivibrio* genus, which convert succinate to propionate as an energy-yielding mechanism. *Butyrivibrio* bacteria are proteolytic bacteria and are involved in the degradation of hemicellulose walls, and lipid hydrogenation. They produce mainly butyrate, that is metabolized through the rumen wall to produce energy. Further, archaeas from the *Methanobrevibacter* genus use hydrogen and CO<sub>2</sub> products and by-products from other microorganism (e.g. *Ruminococcus*) to synthesise methane. The archaea, mainly organisms related with genera *Methanobrevibacter* and *Methanosphaera*, are highly associated with methane emission in ruminants [27].

*Methanobrevibacter* has been associated to methane emissions in many previous studies, e.g. [13,30,31].

*Entodinium* ciliate are able to engulf small plant particles and degrade cellulose [27,32]. They are considered as cellulolytic microorganisms. *Isotricha* and *Dasytricha* use soluble sugar, and many carbohydrates enzymatic activities have been detected. *Polypastron* ciliates can actively ingest large cellulosic fibres of the rumen fluid [27,33]. The products of rumen ciliates are more or less similar and include acetate, butyrate, and lactate. They also produce CO<sub>2</sub> and hydrogen during the synthesis that can be converted to methane by methanogenic archaea and protozoa. Ciliates interact with other rumen microorganism as they can ingest bacteria as protein source. A host genetic effect on the RA of these microorganisms explain the heritability found in related traits such as feed efficiency or methane yield [34–36].

Genome-wide association analyses was performed for the RA the four microorganisms that showed significant effect on both breed and PC1 effect (*Methanobrevibacter*, *Succiniclasticum*, *Prevotella*, and *Polyplastron* genera). The generalized linear model implemented included the breed, diet and the bovine SNP marker effects, and p-values were adjusted on false discovery rate (FDR). As expected, the small sample size caused that most of the markers with significant P-values (<0.01) presented a large FDR. We chose the threshold of FDR<0.15 (equivalent P-value of  $1.81 \times 10^{-4}$ ) to report significant SNP markers. After this adjustment, significant bovine SNP markers were found for *Prevotella* genus RA (Table 3). Most of these markers were within known genes with functions related mainly to metabolic pathways and signalling on the central neural system. The role of the microbiome in the metabolic status and the development of several central system disorders have been well establish in humans [37,38], and our results suggest that there are also associations between genes involved in metabolic and neural processes and the rumen microbiota

compositions. It must be highlighted that we found association between the DGAT1 gene and the RA of *P. Prevotella*. The DGAT1 gene is a major gene with a large effect on the fat composition in milk [39–41]. The association found in this study shows that the effect of the DGAT1 on the milk fat composition may be partially regulated by some effect on the microbiome composition, where individuals carrying the A (A/G) allele of the ARS-BFGL-NGS-4939 SNP tend to host a larger proportion of *Prevotella* microorganisms which are also involved in the protein and peptide degradation in the rumen, in the production of saturated fatty acids as well as in saccharolytic pathways. Other genes with significant association to the *Prevotella* RA were the ACSF3, AGPAT3 and STC2, all of them previously associated to fatty acids or cell metabolism.

The results in this study provide some evidence that support the hypothesis of a host genetic component that can partially regulate the composition of the microbiome, and indirectly some metabolic pathways. In this sense, it seems that there is a genetic component in the regulation of some groups of H<sub>2</sub>-producing microorganisms included in the *Firmicutes* phylum and ciliate protozoa and H<sub>2</sub>-utilizers bacteria associated to *Bacteroidetes*. This is relevant because diets and management practices can be specifically designed to compensate those genotypes that are more susceptible to harbour less efficient microorganisms from a nutritional and energetic point of view. Results from this study must be considered carefully due to the reduced sample size. Future studies should allow to better estimate heritability of the microbiome composition in cattle, as well as covariance components with other traits of interest (e.g. feed efficiency, productivity, or methane emissions). Still, if these results were confirmed, breeding strategies could be developed to select future livestock generations prone to harbor a favourable microbiome composition that improves feed digestion and utilization, while precluding presence of harmful microbes or composition thereof.

275

276

## DECLARATIONS

### **Ethics approval and consent to participate**

It was not considered to ask for an authorization because the procedures used in animals were those used under a common clinical veterinary procedure, therefore not subject to regulation by the Spanish and European Legislation related with the protection of animals used for scientific purposes. Nevertheless, the animals were manipulated according to the Spanish Policy for Animal Protection RD 53/2013, which meets the European Union Directive 86/609 about the protection of animals used in experimentation.

### **Consent for publication**

Not applicable

### **Availability of data and material**

The datasets during and/or analysed during the current study available from the corresponding author on reasonable request, and the authors plan to upload them to a data repository soon.

### **Competing interests**

The authors declare that they have no competing interests.

### **Funding**

Funding from grants INIA RTA2012-00065-C04 and LIFE SEEDCAPITAL-12 ENV/ES/590 is acknowledged.

### **Authors' contributions**

OGR performed the analyses of sequence data, managed the genotyping of the animals, implemented the statistical analyses, discuss the results and wrote the first draft of the manuscript. AGR, IZU and RAT made the experimental design and executed the experiments, collected and analyzed the samples, discussed the results and helped to write the manuscript. AHU performed the preparatory actions for the sequencing analysis and helped writing the manuscript. All authors read and approved the final manuscript.

### **Acknowledgments**

Authors wish to thank Iurancha González for assistance during sampling and Beatriz Oporto and Medelin Ocejo for DNA preparations, as well as the staff from Escuela Agraria de Fraisoro (Basque Department of Environment, Rural Development, Agriculture and Fishery).

## REFERENCES

1. Huttenhower C, Knight R, Brown CT, Caporaso JG, Clemente JC, Gevers D, et al. Advancing the microbiome research community. *Cell* [Internet]. Elsevier Inc.; 2014;159:227–30. Available from: <http://dx.doi.org/10.1016/j.cell.2014.09.022>
2. Waldor MK, Tyson G, Borenstein E, Ochman H, Moeller A, Finlay BB, et al. Where next for microbiome research? *PLoS Biol.* [Internet]. Public Library of Science; 2015 [cited 2015 Oct 25];13:e1002050. Available from: <http://journals.plos.org/plosbiology/article?id=10.1371/journal.pbio.1002050>
3. Malmuthuge N, Guan LL. Gut microbiome and omics: a new definition to ruminant production and health. *Anim. Front.* [Internet]. American Society of Animal Science; 2016 [cited 2016 Apr 12];6:8. Available from: <https://www.animalsciencepublications.org/publications/af/articles/6/2/8>
4. Jewell KA, McCormick CA, Odt CL, Weimer PJ, Suen G. Ruminant Bacterial Community Composition in Dairy Cows Is Dynamic over the Course of Two Lactations and Correlates with Feed Efficiency. *Appl. Environ. Microbiol.* [Internet]. 2015 [cited 2016 Jan 19];81:4697–710. Available from: <http://aem.asm.org/content/early/2015/04/27/AEM.00720-15>
5. Saro C, Ranilla MJ, Tejido ML, Carro MD. Influence of forage type in the diet of sheep on rumen microbiota and fermentation characteristics. *Livest. Sci.* [Internet]. Elsevier; 2014 [cited 2016 Feb 15];160:52–9. Available from: <http://www.livestockscience.com/article/S1871141313005295/fulltext>
6. Saro C, Ranilla MJ, Carro MD. Postprandial changes of fiber-degrading microbes in the rumen of sheep fed diets varying in type of forage as monitored by real-time PCR and automated ribosomal intergenic spacer analysis. *J. Anim. Sci.* [Internet]. 2012 [cited 2016



- 338 Feb 15];90:4487–94. Available from: <http://www.ncbi.nlm.nih.gov/pubmed/23100580>
- 339 7. Henderson G, Cox F, Ganesh S, Jonker A, Young W, Janssen PH. Rumen microbial  
340 community composition varies with diet and host, but a core microbiome is found across a  
341 wide geographical range. *Sci. Rep.* [Internet]. Nature Publishing Group; 2015 [cited 2015 Oct  
342 17];5:14567. Available from:  
343 <http://www.nature.com/srep/2015/151009/srep14567/full/srep14567.html>
- 344 8. Mohammed R, Brink GE, Stevenson DM, Neumann AP, Beauchemin KA, Suen G, et al.  
345 Bacterial communities in the rumen of Holstein heifers differ when fed orchardgrass as  
346 pasture vs. hay. *Front. Microbiol.* [Internet]. 2014 [cited 2016 Mar 16];5:689. Available from:  
347 [http://www.pubmedcentral.nih.gov/articlerender.fcgi?artid=4260508&tool=pmcentrez&rende](http://www.pubmedcentral.nih.gov/articlerender.fcgi?artid=4260508&tool=pmcentrez&rendertype=abstract)  
348 [rtype=abstract](http://www.pubmedcentral.nih.gov/articlerender.fcgi?artid=4260508&tool=pmcentrez&rendertype=abstract)
- 349 9. Deng W, Xi D, Mao H, Wanapat M. The use of molecular techniques based on ribosomal  
350 RNA and DNA for rumen microbial ecosystem studies: a review. *Mol. Biol. Rep.* [Internet].  
351 2008 [cited 2016 Feb 12];35:265–74. Available from:  
352 <http://www.ncbi.nlm.nih.gov/pubmed/17484038>
- 353 10. Wadhwa M, Bakshi MPS, Makkar HPS. Modifying gut microbiomes in large ruminants:  
354 Opportunities in non-intensive husbandry systems. *Anim. Front.* [Internet]. 2016;6:27.  
355 Available from: <https://dl.sciencesocieties.org/publications/af/abstracts/6/2/27>
- 356 11. Yáñez-Ruiz DR, Macías B, Pinloche E, Newbold CJ. The persistence of bacterial and  
357 methanogenic archaeal communities residing in the rumen of young lambs. *FEMS Microbiol.*  
358 *Ecol.* [Internet]. 2010 [cited 2016 Feb 15];72:272–8. Available from:  
359 <http://www.ncbi.nlm.nih.gov/pubmed/20236326>
- 360 12. Hayes BJ, Lewin HA, Goddard ME. The future of livestock breeding: Genomic selection  
361 for efficiency, reduced emissions intensity, and adaptation. *Trends Genet.* [Internet]. Elsevier  
362 Ltd; 2013;29:206–14. Available from: <http://dx.doi.org/10.1016/j.tig.2012.11.009>

13. Wallace RJ, Rooke JA, McKain N, Duthie C-A, Hyslop JJ, Ross DW, et al. The rumen microbial metagenome associated with high methane production in cattle. *BMC Genomics* [Internet]. BioMed Central; 2015 [cited 2016 Feb 15];16:839. Available from: <http://bmcgenomics.biomedcentral.com/articles/10.1186/s12864-015-2032-0>
14. Wang L, Xu Q, Kong F, Yang Y, Wu D, Mishra S, et al. Exploring the Goat Rumen Microbiome from Seven Days to Two Years. *PLoS One* [Internet]. Public Library of Science; 2016 [cited 2016 May 19];11:e0154354. Available from: <http://journals.plos.org/plosone/article?id=10.1371/journal.pone.0154354>
15. Ross EM, Moate PJ, Maret LC, Cocks BG, Hayes BJ. Metagenomic predictions: from microbiome to complex health and environmental phenotypes in humans and cattle. *PLoS One* [Internet]. Public Library of Science; 2013 [cited 2016 Feb 15];8:e73056. Available from: <http://journals.plos.org/plosone/article?id=10.1371/journal.pone.0073056>
16. Weimer PJ, Stevenson DM, Mantovani HC, Man SLC. Host specificity of the ruminal bacterial community in the dairy cow following near-total exchange of ruminal contents. *J. Dairy Sci.* [Internet]. Elsevier; 2010;93:5902–12. Available from: <http://dx.doi.org/10.3168/jds.2010-3500>
17. Roehe R, Dewhurst RJ, Duthie C-A, Rooke JA, McKain N, Ross DW, et al. Bovine Host Genetic Variation Influences Rumen Microbial Methane Production with Best Selection Criterion for Low Methane Emitting and Efficiently Feed Converting Hosts Based on Metagenomic Gene Abundance. *PLoS Genet.* [Internet]. Public Library of Science; 2016 [cited 2016 Mar 21];12:e1005846. Available from: <http://journals.plos.org/plosgenetics/article?id=10.1371/journal.pgen.1005846>
18. Goodrich JK, Davenport ER, Beaumont M, Jackson MA, Knight R, Ober C, et al. Genetic Determinants of the Gut Microbiome in UK Twins. *Cell Host Microbe* [Internet]. Elsevier; 2016 [cited 2016 May 11];19:731–43. Available from:

<http://www.cell.com/article/S1931312816301536/fulltext>

19. Yu Z, Foster R. Methods in gut microbial ecology for ruminants. The Netherlands:

Springer Netherlands; 2005.

20. Caporaso JG, Lauber CL, Walters WA, Berg-Lyons D, Lozupone CA, Turnbaugh PJ, et al. Global patterns of 16S rRNA diversity at a depth of millions of sequences per sample.

Proc. Natl. Acad. Sci. U. S. A. [Internet]. National Academy of Sciences; 2011 [cited 2016

Oct 17];108 Suppl:4516–22. Available from:

<http://www.ncbi.nlm.nih.gov/pubmed/20534432>

21. Caporaso JG, Kuczynski J, Stombaugh J, Bittinger K, Bushman FD, Costello EK, et al.

QIIME allows analysis of high-throughput community sequencing data. Nat. Methods

[Internet]. Nature Publishing Group; 2010 [cited 2014 Jul 10];7:335–6. Available from:

<http://dx.doi.org/10.1038/nmeth.f.303>

22. Altschul SF, Gish W, Miller W, Myers EW, Lipman DJ. Basic local alignment search

tool. J. Mol. Biol. [Internet]. 1990 [cited 2016 Jun 22];215:403–10. Available from:

<http://www.ncbi.nlm.nih.gov/pubmed/2231712>

23. Yang J, Manolio TA, Pasquale LR, Boerwinkle E, Caporaso N, Cunningham JM, et al.

Genome partitioning of genetic variation for complex traits using common SNPs. Nat. Genet.

[Internet]. 2011;43:519–25. Available from:

<http://www.pubmedcentral.nih.gov/articlerender.fcgi?artid=4295936&tool=pmcentrez&rendertype=abstract>

24. Sorensen D, Gianola D. Likelihood, Bayesian and MCMC methods in quantitative

genetics. Springer-Verlag; 2002.

25. R Core Team. R: A language and environment for statistical computing [Internet].

Vienna, Austria: R Foundation for Statistical Computing; 2015. Available from:

<https://www.r-project.org/>

- 413 26. Cuscó A, Casellas J, Francino O. CoMINO v.1.2: Network analysis program for  
414 directional interactions in microbiome. Barcelona Debates Hum. microbiome from microbes  
415 to Med. 2016.
- 416 27. Jouany JP. Rumen Microbial Metabolism and Ruminant Digestion [Internet]. Editions  
417 Quae; 1991 [cited 2016 Jul 11]. Available from: [https://books.google.fr/books?id=Bcsa8Z4u-](https://books.google.fr/books?id=Bcsa8Z4u-E4C)  
418 E4C
- 419 28. Atasoglu C, Valdés C, Walker ND, Newbold CJ, Wallace RJ. De novo synthesis of amino  
420 acids by the ruminal bacteria *Prevotella bryantii* B14, *Selenomonas ruminantium* HD4, and  
421 *Streptococcus bovis* ES1. Appl. Environ. Microbiol. [Internet]. American Society for  
422 Microbiology (ASM); 1998 [cited 2016 Oct 17];64:2836–43. Available from:  
423 <http://www.ncbi.nlm.nih.gov/pubmed/9687438>
- 424 29. Lou J, Dawson KA, Strobel HJ. Glycogen Formation by the Ruminal Bacterium  
425 *Prevotella ruminicola*. Appl. Environ. Microbiol. 1997;63:1483–8.
- 426 30. Zhou M, Hernandez-Sanabria E, Guan LL. Characterization of variation in rumen  
427 methanogenic communities under different dietary and host feed efficiency conditions, as  
428 determined by PCR-denaturing gradient gel electrophoresis analysis. Appl. Environ.  
429 Microbiol. [Internet]. 2010 [cited 2016 Feb 15];76:3776–86. Available from:  
430 <http://aem.asm.org/content/76/12/3776.full>
- 431 31. Zhou M, Hernandez-Sanabria E, Guan LL. Assessment of the microbial ecology of  
432 ruminal methanogens in cattle with different feed efficiencies. Appl. Environ. Microbiol.  
433 [Internet]. 2009 [cited 2016 Feb 15];75:6524–33. Available from:  
434 <http://aem.asm.org/content/75/20/6524.abstract>
- 435 32. Dauvrin T. La caractérisation de l'invertase du Cilié du rumen *Isotricha prostoma*, révèle  
436 certaines propriétés originales. Université Catholique de Louvain; 1988.
- 437 33. Belanche A, de la Fuente G, Moorby JM, Newbold CJ. Bacterial protein degradation by

different rumen protozoal groups. J. Anim. Sci. [Internet]. American Society of Animal Science; 2012 [cited 2016 Jul 11];90:4495–504. Available from: <http://www.animalsciencepublications.org/publications/jas/abstracts/90/12/4495>

34. Basarab JA, Beauchemin KA, Baron VS, Ominski KH, Guan LL, Miller SP, et al. Reducing GHG emissions through genetic improvement for feed efficiency: effects on economically important traits and enteric methane production. Animal [Internet]. 2013 [cited 2016 Feb 15];7 Suppl 2:303–15. Available from: <http://www.pubmedcentral.nih.gov/articlerender.fcgi?artid=3691002&tool=pmcentrez&rendertype=abstract>

35. Pryce JE, Wales WJ, de Haas Y, Veerkamp RF, Hayes BJ. Genomic selection for feed efficiency in dairy cattle. Animal [Internet]. 2014;8:1–10. Available from: [http://www.journals.cambridge.org/abstract\\_S1751731113001687](http://www.journals.cambridge.org/abstract_S1751731113001687) [http://journals.cambridge.org/download.php?file=/ANM/ANM8\\_01/S1751731113001687a.pdf&code=5f1942a3f4fe810a3a840b894cced959](http://journals.cambridge.org/download.php?file=/ANM/ANM8_01/S1751731113001687a.pdf&code=5f1942a3f4fe810a3a840b894cced959) <http://www.ncbi.nlm.nih.gov/pubmed/24128704>

36. Pryce JE, Gonzalez-Recio O, Nieuwhof G, Wales WJ, Coffey MP, Hayes BJ, et al. Hot topic: Definition and implementation of a breeding value for feed efficiency in dairy cows. J. Dairy Sci. [Internet]. Elsevier Inc.; 2015 [cited 2016 Feb 8];98:7340–50. Available from: <http://www.scopus.com/inward/record.url?eid=2-s2.0-84942553085&partnerID=tZOtx3y1>

37. Foster JA, Lyte M, Meyer E, Cryan JF. Gut microbiota and brain function: An evolving field in neuroscience. Int. J. Neuropsychopharmacol. 2015;

38. Nicholson JK, Holmes E, Kinross J, Burcelin R, Gibson G, Jia W, et al. Host-Gut Microbiota Metabolic Interactions. Science (80-. ). 2012;336.

39. Mohammed S, Mohammed SA, Rahamtalla SA, Ahmed SS, elamin khalid mohammed, Dousa BM, et al. DGAT1 Gene in Dairy Cattle: A Review. Glob. J. Anim. Sci. Res. [Internet]. 2014 [cited 2016 Oct 11];3:191–8. Available from:

<http://www.gjasr.com/index.php/GJASR/article/view/142>

40. Grisart B, Farnir F, Karim L, Cambisano N, Kim J-J, Kvasz A, et al. Genetic and functional confirmation of the causality of the DGAT1 K232A quantitative trait nucleotide in affecting milk yield and composition. *Proc. Natl. Acad. Sci. U. S. A.* [Internet]. National Academy of Sciences; 2004 [cited 2016 Oct 11];101:2398–403. Available from: <http://www.ncbi.nlm.nih.gov/pubmed/14983021>

41. Coppieters W, Riquet J, Arranz J-J, Berzi P, Cambisano N, Grisart B, et al. A QTL with major effect on milk yield and composition maps to bovine Chromosome 14. *Mamm. Genome* [Internet]. Springer-Verlag; 1998 [cited 2016 Oct 11];9:540–4. Available from: <http://link.springer.com/10.1007/s003359900815>

**Table 1.** Effect<sup>1</sup> of the breed (Holstein vs Brown Swiss) and the two first principal component of a genomic relationship matrix based on genotypes on the relative abundance of different bacteria and archaea genera. Only genera that are present with average relative abundance larger than 0.1% in both breeds are shown.

| Domain   | Phylum        | (Family) Genus                            | Breed | PC1  | PC2  |
|----------|---------------|-------------------------------------------|-------|------|------|
| Archaea  | Euryarchaeota | Methanobacteriaceae<br>Methanobrevibacter | *     | *    | *    |
| Bacteria | Firmicutes    | Lachnospiraceae Butyrivibrio              | N.S.  | N.S. | *    |
| Bacteria | Firmicutes    | Veillonellaceae Succiniclasticum          | *     | *    | N.S. |
| Bacteria | Firmicutes    | Ruminococcaceae Ruminococcus              | N.S.  | N.S. | *    |
| Bacteria | Bacteroidetes | Prevotellaceae Prevotella                 | *     | *    | *    |
| Bacteria | Bacteroidetes | Paraprevotellaceae YRC22                  | *     | N.S. | *    |

<sup>1</sup> \* states that >80% of the posterior distribution of the effect was either larger or lower than zero, suggesting a significant effect of the breed or of the principal component on the relative abundance. N.S. states otherwise.

**Table 2.** Effect<sup>1</sup> of the breed (Holstein vs Brown Swiss) and the two first principal component of a genomic relationship matrix based on genotypes on the relative abundance of different ciliate genera. Only genera that are present with average relative abundance larger than 0.1% in both breeds are shown.

| Domain           | Order             | (Family) Genus                     | Breed | PC1  | PC2  |
|------------------|-------------------|------------------------------------|-------|------|------|
| <b>Eukaryota</b> | <i>Ciliophora</i> | <i>Litostomatea Trichostomatia</i> | N.S.  | N.S. | N.S. |
| <b>Eukaryota</b> | <i>Ciliophora</i> | <i>Trichostomatia Dasytricha</i>   | N.S.  | N.S. | N.S. |
| <b>Eukaryota</b> | <i>Ciliophora</i> | <i>Trichostomatia Entodinium</i>   | N.S.  | N.S. | *    |
| <b>Eukaryota</b> | <i>Ciliophora</i> | <i>Trichostomatia Isotricha</i>    | *     | N.S. | N.S. |
| <b>Eukaryota</b> | <i>Ciliophora</i> | <i>Trichostomatia Diplodinium</i>  | N.S.  | N.S. | N.S. |
| <b>Eukaryota</b> | <i>Ciliophora</i> | <i>Trichostomatia Ophryoscolex</i> | *     | N.S. | *    |
| <b>Eukaryota</b> | <i>Ciliophora</i> | <i>Trichostomatia Polyplastron</i> | *     | *    | *    |

<sup>1</sup> \* states that >80% of the posterior distribution of the effect was either larger or lower than zero, suggesting a significant effect of the breed or of the principal component on the relative abundance. N.S. states otherwise.



**Table 3.** Genes contained within significant bovine SNP markers for the relative abundance of *P. Prevotella*, and their position.

| SNP name            | SNP position | Gene     | Related function                                                                     | P-value               |
|---------------------|--------------|----------|--------------------------------------------------------------------------------------|-----------------------|
| ARS-BFGL-NGS-13121  | 1:146833973  | AGPAT3   | Metabolic pathways and glycerolipid metabolism                                       | $5.02 \times 10^{-5}$ |
| ARS-BFGL-NGS-106490 | 3:13635591   | Unknown  | -                                                                                    | $1.60 \times 10^{-4}$ |
| ARS-BFGL-NGS-28573  | 3:24081964   | Unknown  | -                                                                                    | $2.05 \times 10^{-5}$ |
| BTB-01512420        | 8:72495155   | ADAMDEC1 | Dendritic cell maturation and functions                                              | $1.56 \times 10^{-4}$ |
| ARS-BFGL-NGS-32158  | 12:90983897  | RASA3    | Ras signalling pathway; control of intracellular signaling networks                  | $1.81 \times 10^{-4}$ |
| ARS-BFGL-NGS-4939   | 14:1801116   | DGAT1    | Conversion of diacylglycerol and fatty acyl CoA to triacylglycerol; metabolic status | $1.81 \times 10^{-4}$ |
| ARS-BFGL-NGS-31386  | 18:14208633  | ACSF3    | Fatty acid, triacylglycerol, and ketone body metabolism                              | $1.81 \times 10^{-4}$ |
| ARS-BFGL-NGS-112014 | 18:34794005  | CES3     | Fatty acyl and cholesterol ester metabolism                                          | $1.72 \times 10^{-4}$ |
| ARS-BFGL-NGS-31292  | 20:4907906   | STC2     | Autocrine or paracrine functions and cell metabolism                                 | $1.81 \times 10^{-4}$ |
| ARS-BFGL-NGS-31656  | 26:51426365  | Unknown  | -                                                                                    | $1.81 \times 10^{-4}$ |
| BTA-122892-no-rs    | X:81638519   | SLC16A2  | Transporter of thyroid hormone and development of the central nervous system         | $1.81 \times 10^{-4}$ |

**Figure 1.** Relative abundance of Bacteria and Euryarchaea with average relative abundance larger than 0.1% in both breeds.

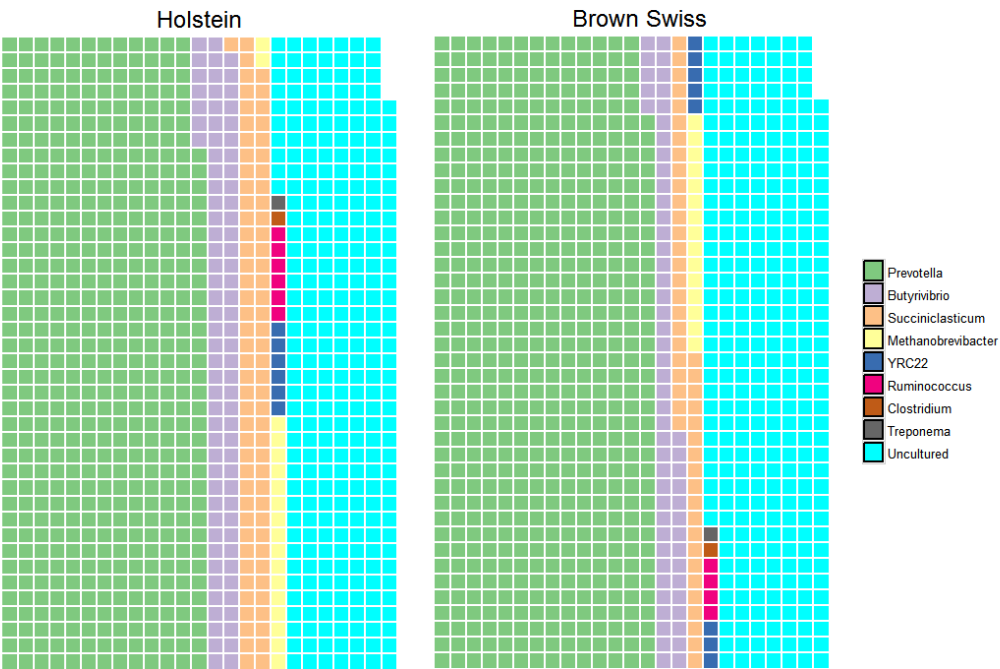

**Figure 2.** Relative abundance of genera of ciliate with average relative abundance larger than 0.1% in both breeds.

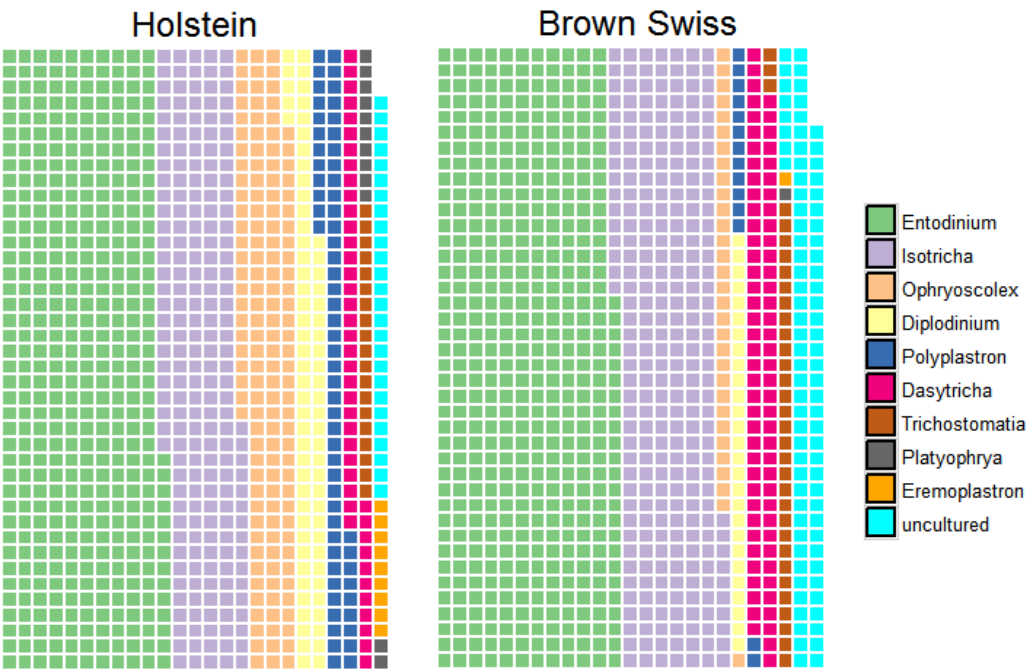

**Figure S1.** Microbial network based on 16S rRNA-gene based region for microorganism with relative abundance larger than 0.1% in both breeds. The size of the nodes represents the relative abundance of the genera.

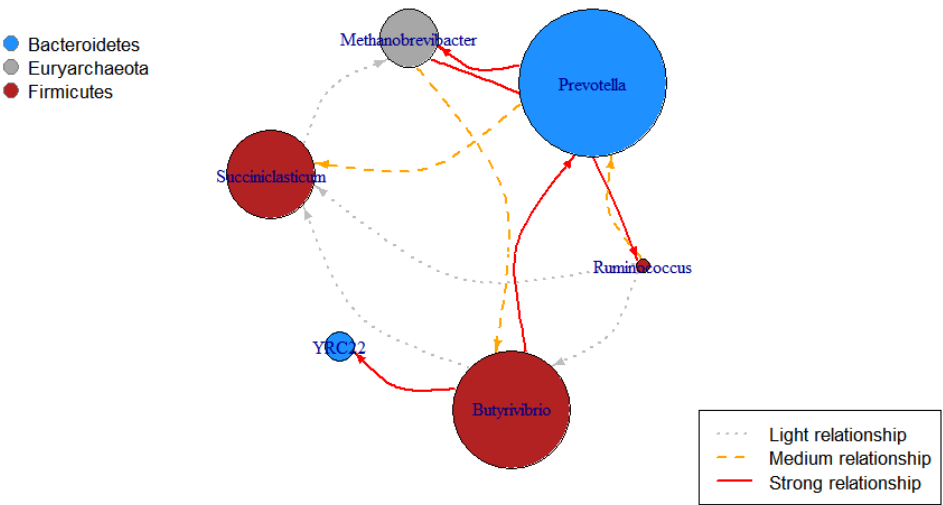

522 **Figure S2.** Microbial network based on 18S rRNA-gene based region for ciliates with  
 523 relative abundance larger than 0.1% in both breeds. The size of the nodes represents the  
 524 relative abundance of the genera.

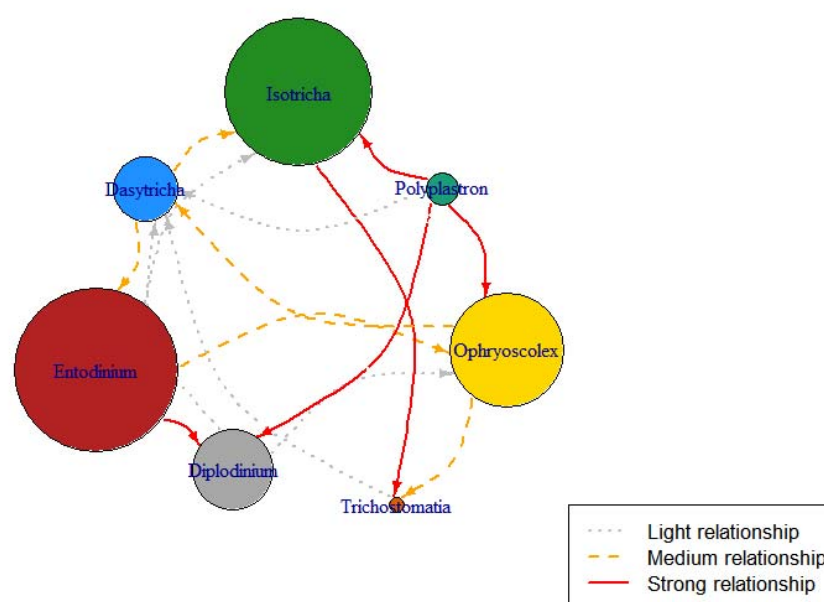

525

526
